# Supplementary material for: Computational investigations of stable multiple-cage-occupancy He clathrate-like hydrostructures
Source: Royal Society of Chemistry journal article supplement (doi:10.1039/d3cp00603d), 2023-01-01
Supplement: d3cp00603d1.pdf [file d3cp00603d1.pdf]

# Computational investigations of stable multiple cage occupancy He clathrate-like hydrostructures

Raquel Yanes-Rodríguez<sup>§a</sup> and Rita Prosimi<sup>§\*</sup>

<sup>§</sup>*Institute of Fundamental Physics (IFF-CSIC), CSIC, Serrano 123, 28006 Madrid, Spain*

E-mail: \*rita@iff.csic.es;Phone:+34-91-5616800Ext.442292

---

<sup>a</sup>Doctoral Programme in Theoretical Chemistry and Computational Modelling, Doctoral School, Universidad Autónoma de Madrid

## Supplementary material

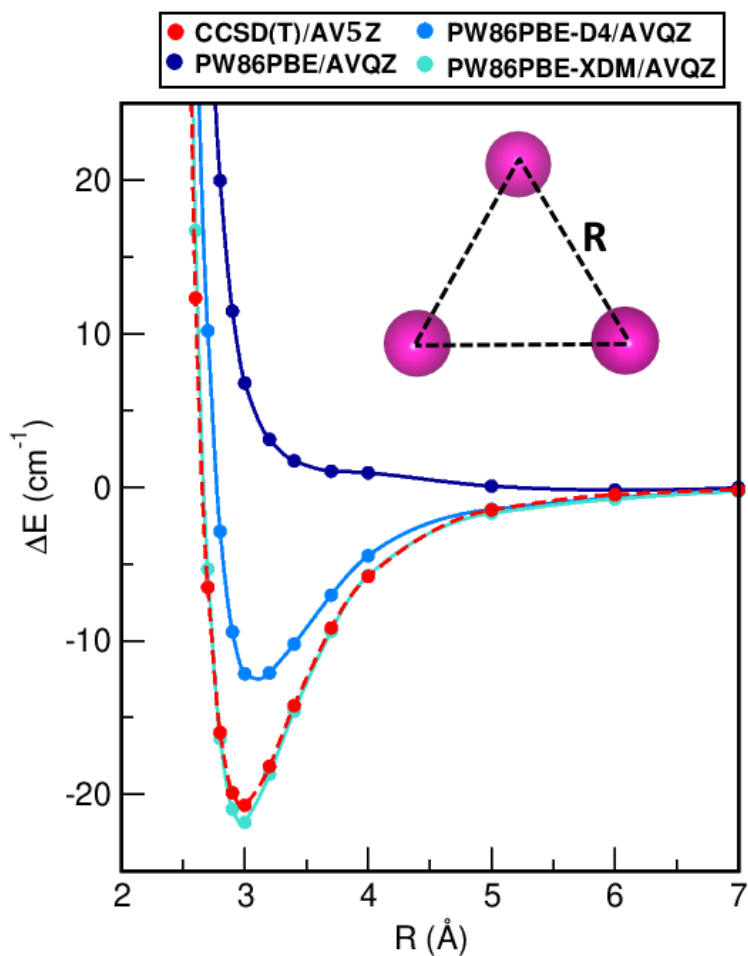

Figure S1: Interaction energies (in  $\text{cm}^{-1}$ ) for the  $\text{He}_3$  as a function of He-He distance calculated at the CCSD(T)/AV5Z and PW86PBE(-XDM/D4)/AVQZ levels of theory.

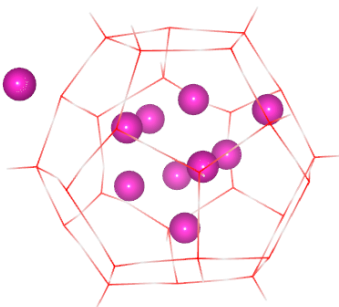

Figure S2: Optimized  $\text{He}_{10}@\text{H}$  structure from PW86PBE/AVTZ calculations.

**Table S1:** Total energies (in a.u.) of the optimized structures of the isolated  $\text{He}_N$  atoms from CCSD(T) using the AV6Z, AV5Z, AVQZ and AVTZ basis sets for  $N=2-4, 5-6, 7-8$  and  $9$ , respectively, and PW86PBE/AVQZ calculations.

| N | E (H)   |         |
|---|---------|---------|
|   | CCSD(T) | PW86PBE |
| 1 | -2.903  | -2.912  |
| 2 | -5.807  | -5.825  |
| 3 | -8.710  | -8.737  |
| 4 | -11.614 | -11.650 |
| 5 | -14.516 | -14.562 |
| 6 | -17.419 | -17.475 |
| 7 | -20.317 | -20.387 |
| 8 | -23.219 | -23.299 |
| 9 | -26.106 | -26.208 |

**Table S2:** Total energies (in a.u.) and interaction energies (in  $\text{cm}^{-1}$ ) of the  $\text{He}_N\text{@D}$  systems from PW86PBE/AVTZ optimization calculations.

| N | PW86PBE                |           |               |                                 | PW86PBE-D4             |           |               |                                 | PW86PBE-XDM            |           |               |                                 |
|---|------------------------|-----------|---------------|---------------------------------|------------------------|-----------|---------------|---------------------------------|------------------------|-----------|---------------|---------------------------------|
|   | $\text{He}_N\text{@D}$ | D         | $\text{He}_N$ | $\Delta E$ ( $\text{cm}^{-1}$ ) | $\text{He}_N\text{@D}$ | D         | $\text{He}_N$ | $\Delta E$ ( $\text{cm}^{-1}$ ) | $\text{He}_N\text{@D}$ | D         | $\text{He}_N$ | $\Delta E$ ( $\text{cm}^{-1}$ ) |
| 1 | -1533.204              | -1530.292 | -2.912        | 21.387                          | -1533.241              | -1530.328 | -2.912        | -174.694                        | -1533.241              | -1530.328 | -2.912        | -200.426                        |
| 2 | -1536.115              | -1530.292 | -5.824        | 265.794                         | -1536.153              | -1530.328 | -5.824        | -198.169                        | -1536.153              | -1530.328 | -5.824        | -249.921                        |
| 3 | -1539.024              | -1530.292 | -8.735        | 803.349                         | -1539.063              | -1530.328 | -8.735        | 85.555                          | -1539.063              | -1530.328 | -8.735        | 15.826                          |
| 4 | -1541.931              | -1530.292 | -11.646       | 1442.066                        | -1541.972              | -1530.328 | -11.646       | 474.275                         | -1541.973              | -1530.328 | -11.646       | 388.727                         |

**Table S3:** Total energies (in a.u.) and interaction energies (in  $\text{cm}^{-1}$ ) of the  $\text{He}_N\text{@H}$  from optimization PW86PBE/AVTZ calculations.

| N | PW86PBE                |           |               |                                 | PW86PBE-D4             |           |               |                                 | PW86PBE-XDM            |           |               |                                 |
|---|------------------------|-----------|---------------|---------------------------------|------------------------|-----------|---------------|---------------------------------|------------------------|-----------|---------------|---------------------------------|
|   | $\text{He}_N\text{@H}$ | H         | $\text{He}_N$ | $\Delta E$ ( $\text{cm}^{-1}$ ) | $\text{He}_N\text{@H}$ | H         | $\text{He}_N$ | $\Delta E$ ( $\text{cm}^{-1}$ ) | $\text{He}_N\text{@H}$ | H         | $\text{He}_N$ | $\Delta E$ ( $\text{cm}^{-1}$ ) |
| 1 | -2145.327              | -2142.415 | -2.912        | 49.931                          | -2145.378              | -2142.466 | -2.912        | -131.217                        | -2145.377              | -2142.465 | -2.912        | -148.278                        |
| 2 | -2148.239              | -2142.415 | -5.824        | 27.400                          | -2148.291              | -2142.466 | -5.824        | -257.015                        | -2148.290              | -2142.465 | -5.824        | -294.762                        |
| 3 | -2151.150              | -2142.415 | -8.736        | 83.572                          | -2151.203              | -2142.466 | -8.736        | -380.308                        | -2151.203              | -2142.465 | -8.736        | -442.048                        |
| 4 | -2154.062              | -2142.415 | -11.648       | 130.491                         | -2154.116              | -2142.466 | -11.648       | -514.539                        | -2154.116              | -2142.465 | -11.648       | -597.346                        |
| 5 | -2156.973              | -2142.415 | -14.559       | 315.743                         | -2157.028              | -2142.466 | -14.560       | -539.019                        | -2157.028              | -2142.465 | -14.560       | -652.170                        |
| 6 | -2159.884              | -2142.415 | -17.471       | 466.469                         | -2159.940              | -2142.466 | -17.472       | -588.046                        | -2159.940              | -2142.465 | -17.472       | -722.417                        |
| 7 | -2162.794              | -2142.415 | -20.383       | 766.238                         | -2162.851              | -2142.466 | -20.383       | -515.842                        | -2162.851              | -2142.465 | -20.384       | -669.403                        |
| 8 | -2165.703              | -2142.415 | -23.294       | 1117.406                        | -2165.762              | -2142.466 | -23.294       | -378.939                        | -2165.762              | -2142.465 | -23.295       | -554.768                        |
| 9 | -2168.612              | -2142.415 | -26.205       | 1731.894                        | -2168.671              | -2142.466 | -26.206       | -1.653                          | -2168.672              | -2142.465 | -26.206       | -179.533                        |

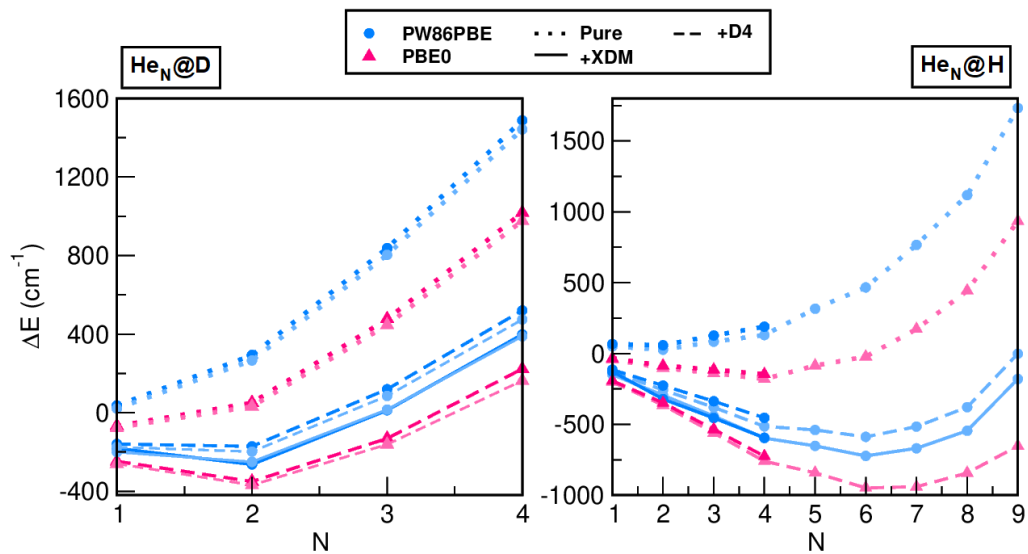

Figure S3: Interaction energies (in  $\text{cm}^{-1}$ ) calculated at PW86PBE and PBE0 levels of theory, with and without dispersion corrections, as a function of the number of the encapsulated He atoms. Dark colors corresponds to AVQZ calculations, while light colors to AVTZ calculations.
